# Supplementary material for: Grapefruit Seed Extract as a Natural Derived Antibacterial Substance against Multidrug-Resistant Bacteria
Source: Antibiotics (Basel). 2021 Jan 18;10(1):85. doi: 10.3390/antibiotics10010085 (PMC7830962; doi:10.3390/antibiotics10010085)
Supplement: Supplementary file 1 [file antibiotics-10-00085-s001.pdf]

## Supplementary data

**Table S1. List of plant extracts used for the antibacterial activity test**

| Number | Plant extracts from                            | Extraction type | Source       |
|--------|------------------------------------------------|-----------------|--------------|
| 1      | Bamboo                                         | Hot water       | KoreaSimilac |
| 2      | Refined wood vinegar                           | Confidential    | HERBFLOA     |
| 3      | Rosemary                                       | Hot water       | HERBFLOA     |
| 4      | <i>Pinus densiflora</i> leaf                   | Confidential    | HERBFLOA     |
| 5      | <i>Sophora</i>                                 | Hot water       | HERBFLOA     |
| 6      | <i>Cinnamomum cassia</i> bark                  | Low temperature | HERBFLOA     |
| 7      | <i>Hibiscus sabdariffa</i> flower              | Low temperature | HERBFLOA     |
| 8      | <i>Chamomilla recutita</i> (Matricaria) flower | Low temperature | HERBFLOA     |
| 9      | <i>Centella asiatica</i>                       | Hot water       | HERBFLOA     |
| 10     | <i>Houttuynia cordata</i>                      | Hot water       | HERBFLOA     |
| 11     | Yucca                                          | Hot water       | HERBFLOA     |
| 12     | Grapefruit seed                                | Confidential    | CANDLEIKEA   |

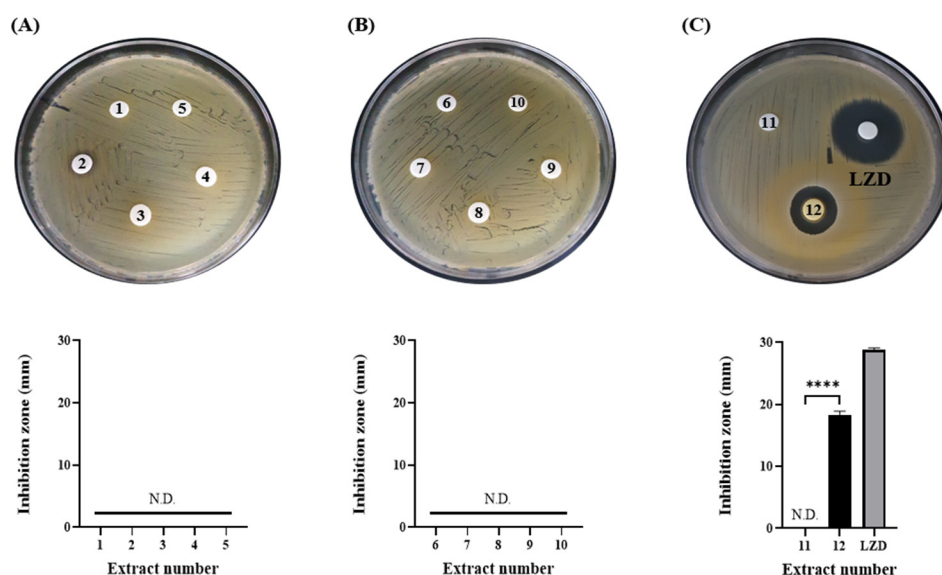

**Figure S1.** Antibacterial activity in 12 plant extract screening tests against MSSA. The experiment was conducted according to the extract number specified in Table S1. 1-5 (A), 6-10 (B), and 11-LZD (C). The concentration of LZD was 30 µg/disk. N.D. signifies that inhibition zone was not detected. The diameters of the inhibition zones are illustrated by the bar graphs as the means  $\pm$  SD (n=3). LZD used as a quality control. Except for GSE, other plant extracts did not show antimicrobial effects against MSSA. Therefore, for subsequent experiments, only GSE was used.  $p$  values were calculated using two-tailed, unpaired  $t$ -tests in this figure. \*\*\*\* $p < 0.0001$ .

**(A) Quercetin**

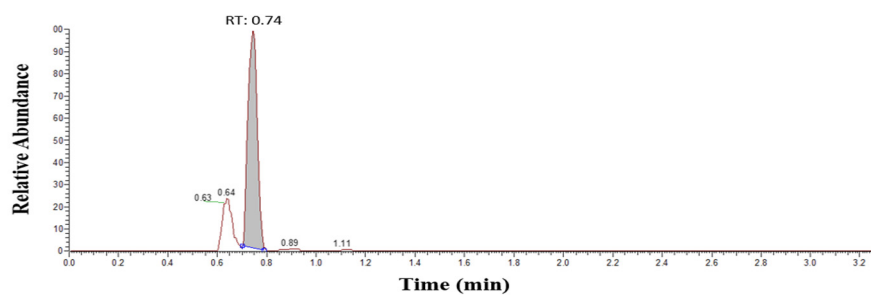

**(B) Hesperidin**

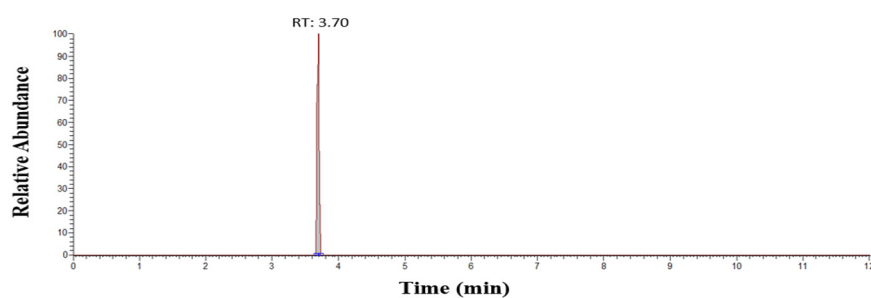

**Figure S2.** LC-MS Chromatogram of quercetin and hesperidin. LC-MS chromatograms showing (A) quercetin at 0.74 min and (B) hesperidin at 3.70 min. RT is retention time.

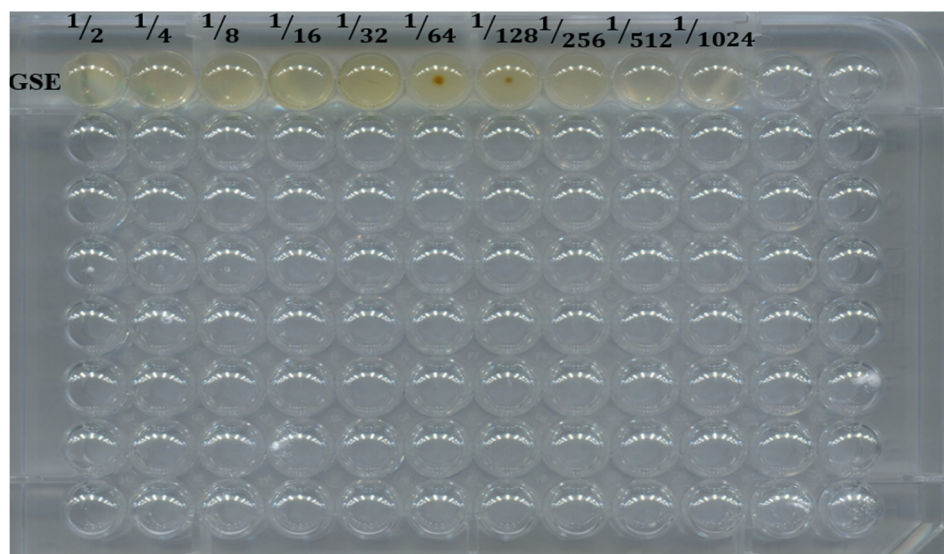

**Figure S3.** GSE incubation without bacteria and antimicrobial agents. From left to right, GSE concentrations are 1/2 to 1/1024. The purpose of this figure is to show the effect of GSE itself after incubation. This is the result of adding 100  $\mu$ L of DW to 100  $\mu$ L of diluted GSE from 1 to 1/512 concentration and incubating for 18 h at 37°C. Red dots were identified at 1/64 and 1/128 concentrations, and it was confirmed that the solution became cloudy at the surrounding concentrations.
